# Supplementary material
Source: publisher figshare collection journal article supplement (https://acs.figshare.com/ndownloader/files/4388023)
Supplement: Supplementary file 1 [file 4388023]

## **Quadratic and Cubic Nonlinear Optical Properties of Salts of Diquat-Based Chromophores with Diphenylamino Substituents**

Benjamin J. Coe, John Fielden, Simon P. Foxon, Madeleine Helliwell, Bruce S. Brunshaw, Inge Asselberghs, Koen Clays, Joanna Olesiak, Katarzyna Matczyszyn, and Marek Samoc

### **Supporting Information**

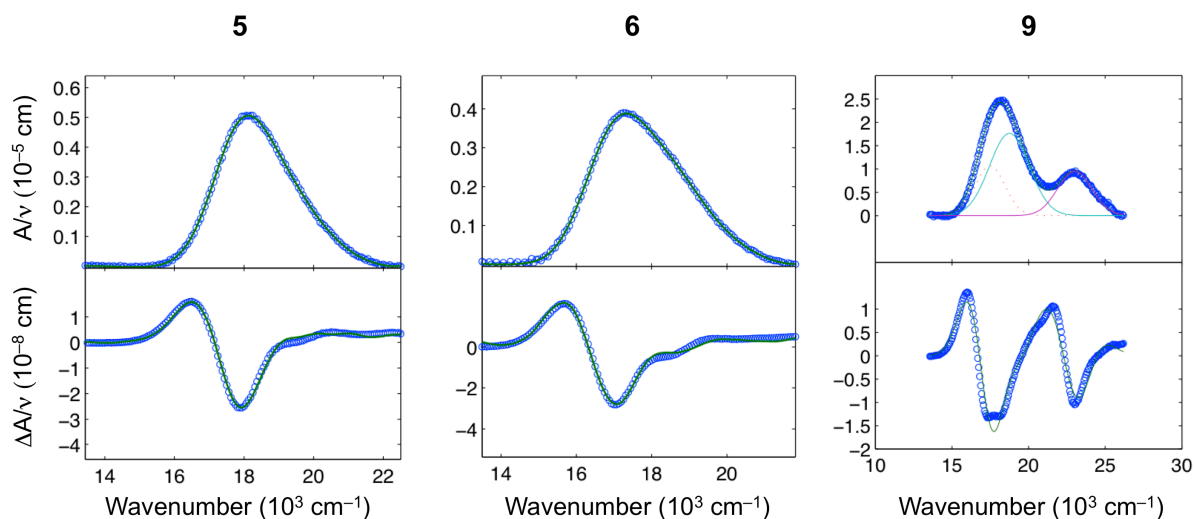

**Figure S1.** Stark spectra and calculated fits for salts **5**, **6** and **9** in an external electric field of  $3.51 \times 10^7 \text{ V m}^{-1}$ . Top panel: absorption spectrum illustrating Gaussian curves used in data fitting for **9**; bottom panel: electroabsorption spectrum, experimental (blue) and fits (green) according to the Liptay equation.<sup>1</sup>

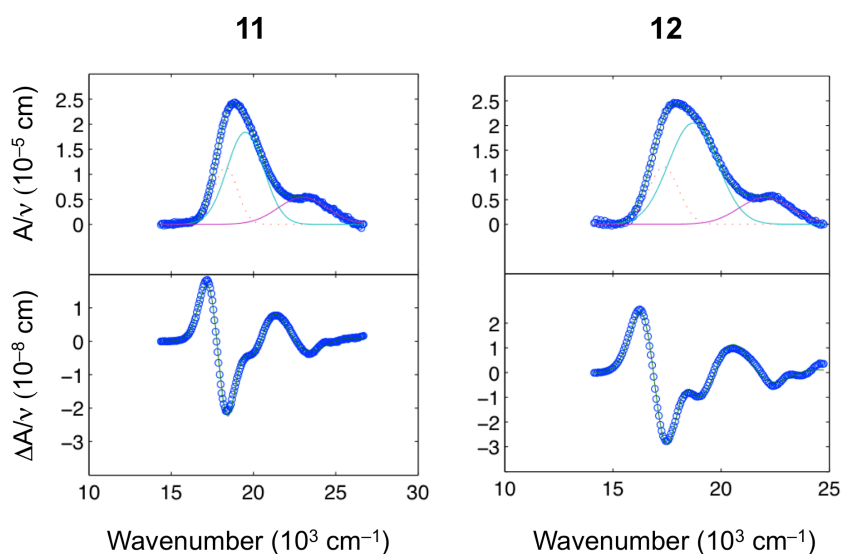

**Figure S2.** Stark spectra and calculated fits for salts **11** and **12** in external electric fields of  $3.51$  and  $3.57 \times 10^7 \text{ V m}^{-1}$ , respectively. Top panel: absorption spectrum illustrating Gaussian curves used in data fitting; bottom panel: electroabsorption spectrum, experimental (blue) and fits (green) according to the Liptay equation.<sup>1</sup>

(1) Liptay, W. In *Excited States*, Vol. 1; Lim, E. C., Ed.; Academic Press, New York, 1974, pp. 129–229.

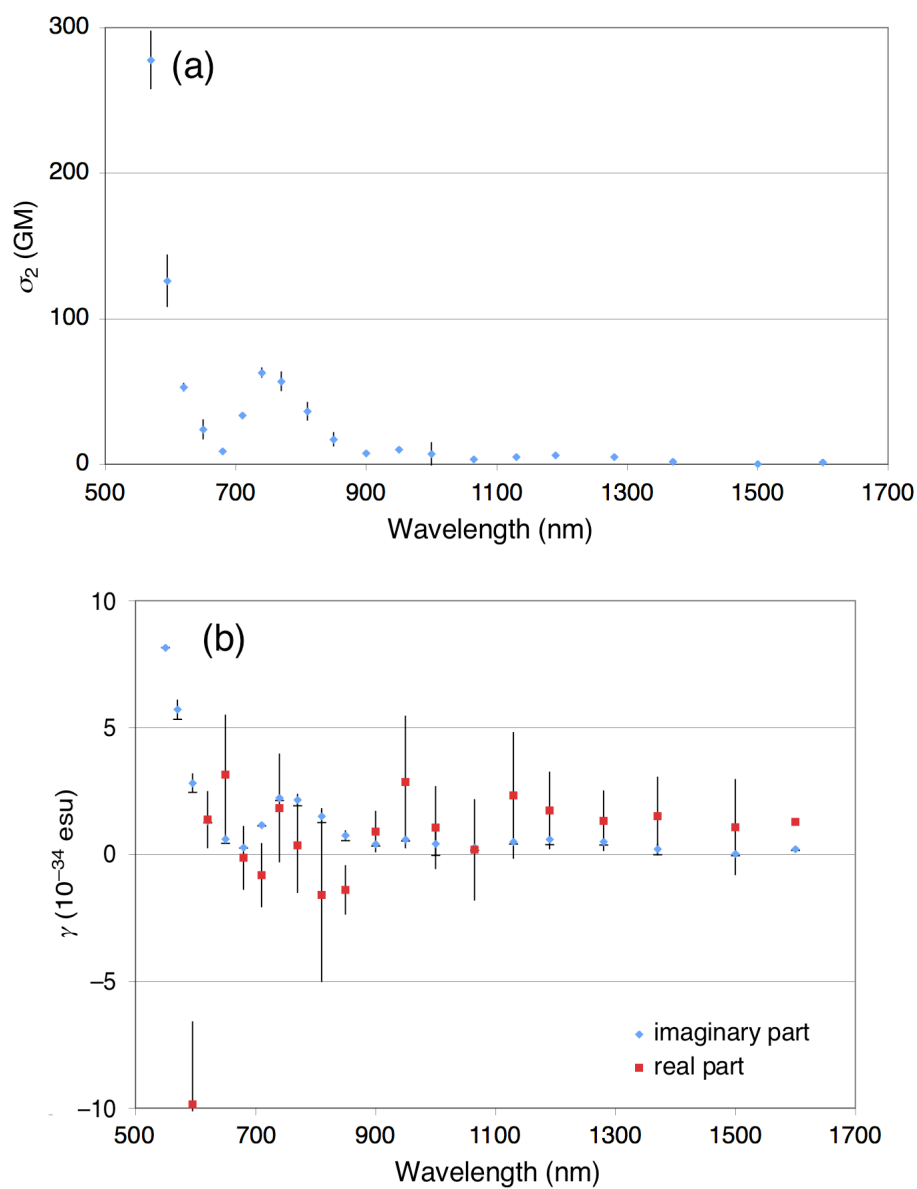

**Figure S3.** Dispersion of (a) the 2PA cross-section and (b) the complex cubic hyperpolarizability of compound **1**.

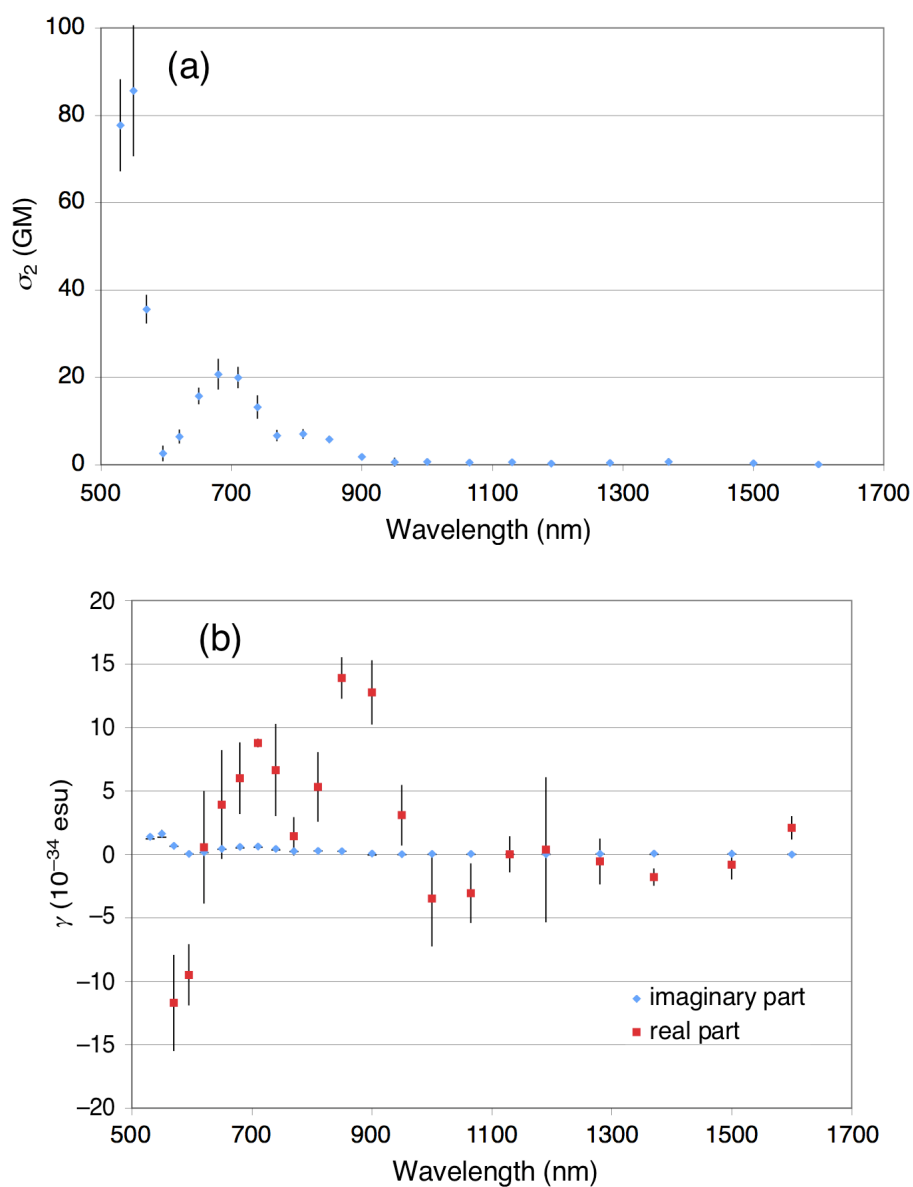

**Figure S4.** Dispersion of (a) the 2PA cross-section and (b) the complex cubic hyperpolarizability of compound 2.

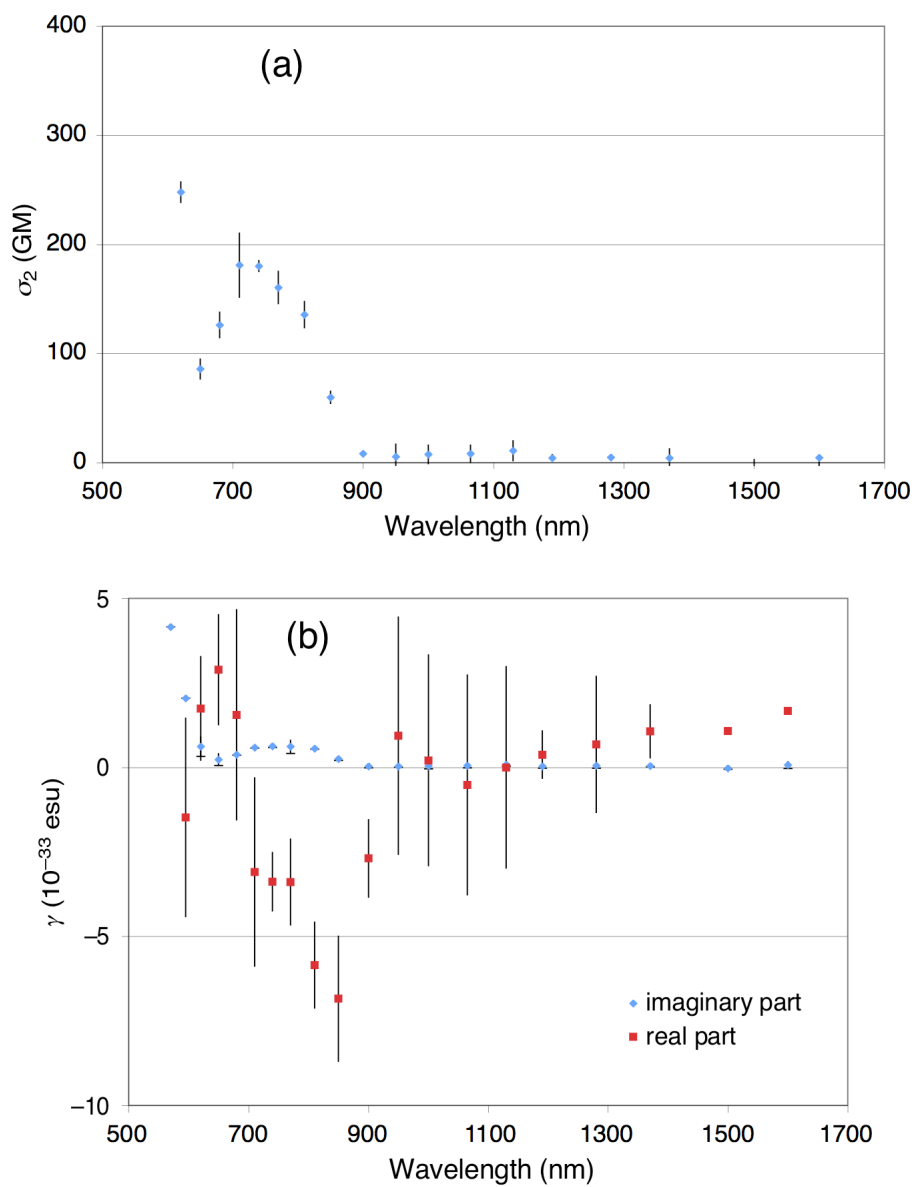

**Figure S5.** Dispersion of (a) the 2PA cross-section and (b) the complex cubic hyperpolarizability of compound **3**.

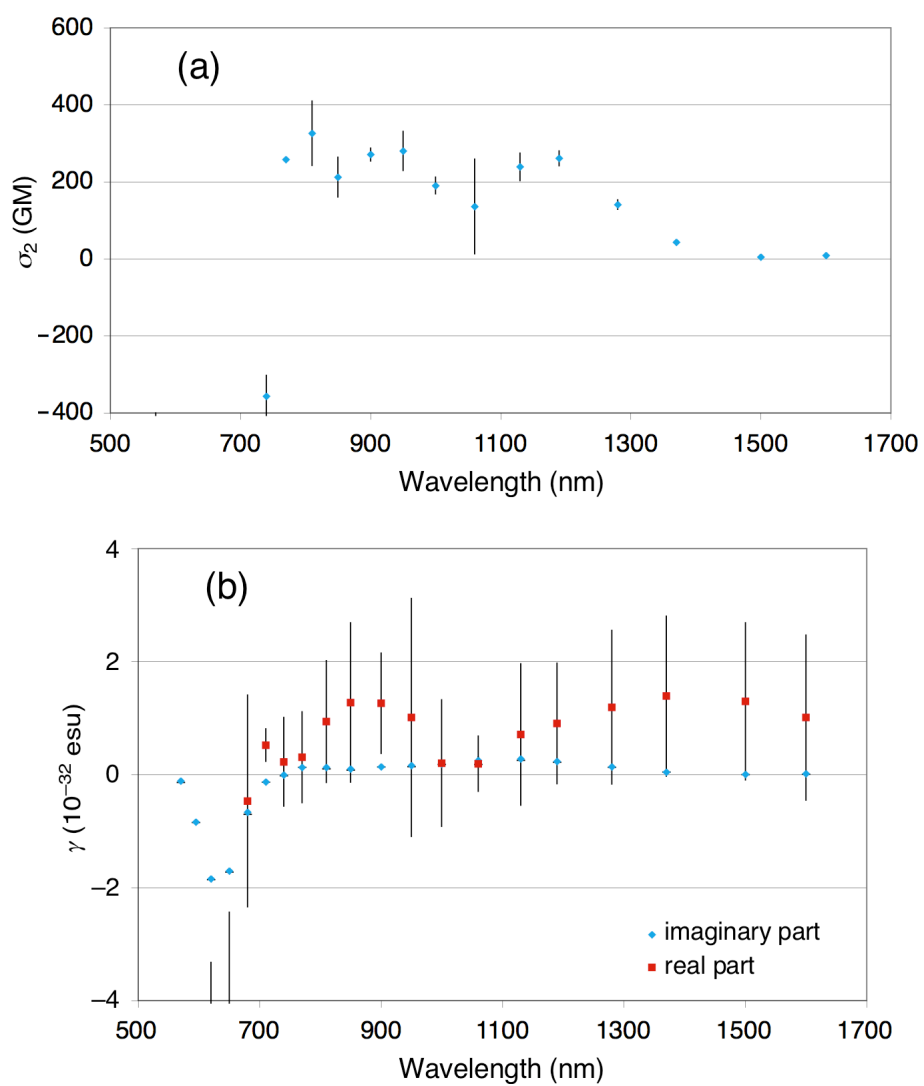

**Figure S6.** Dispersion of (a) the 2PA cross-section and (b) the complex cubic hyperpolarizability of salt 5.

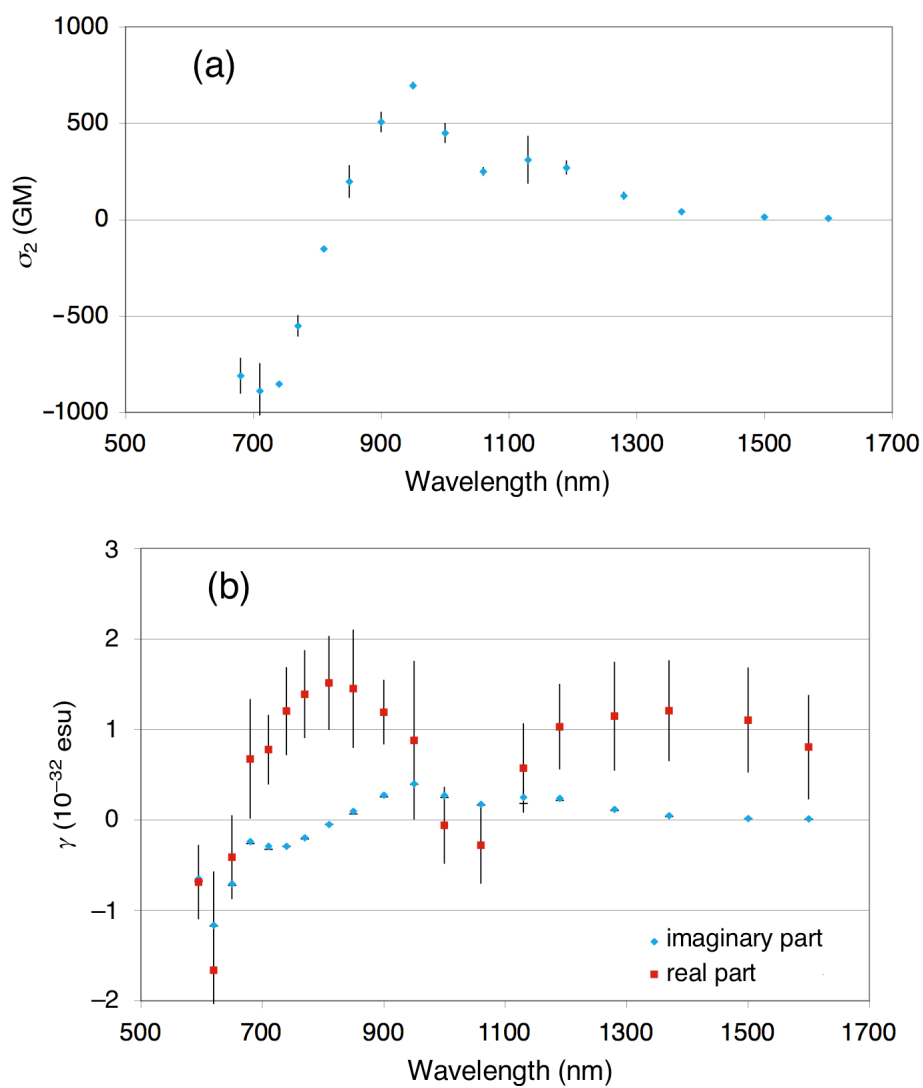

**Figure S7.** Dispersion of (a) the 2PA cross-section and (b) the complex cubic hyperpolarizability of salt 7.

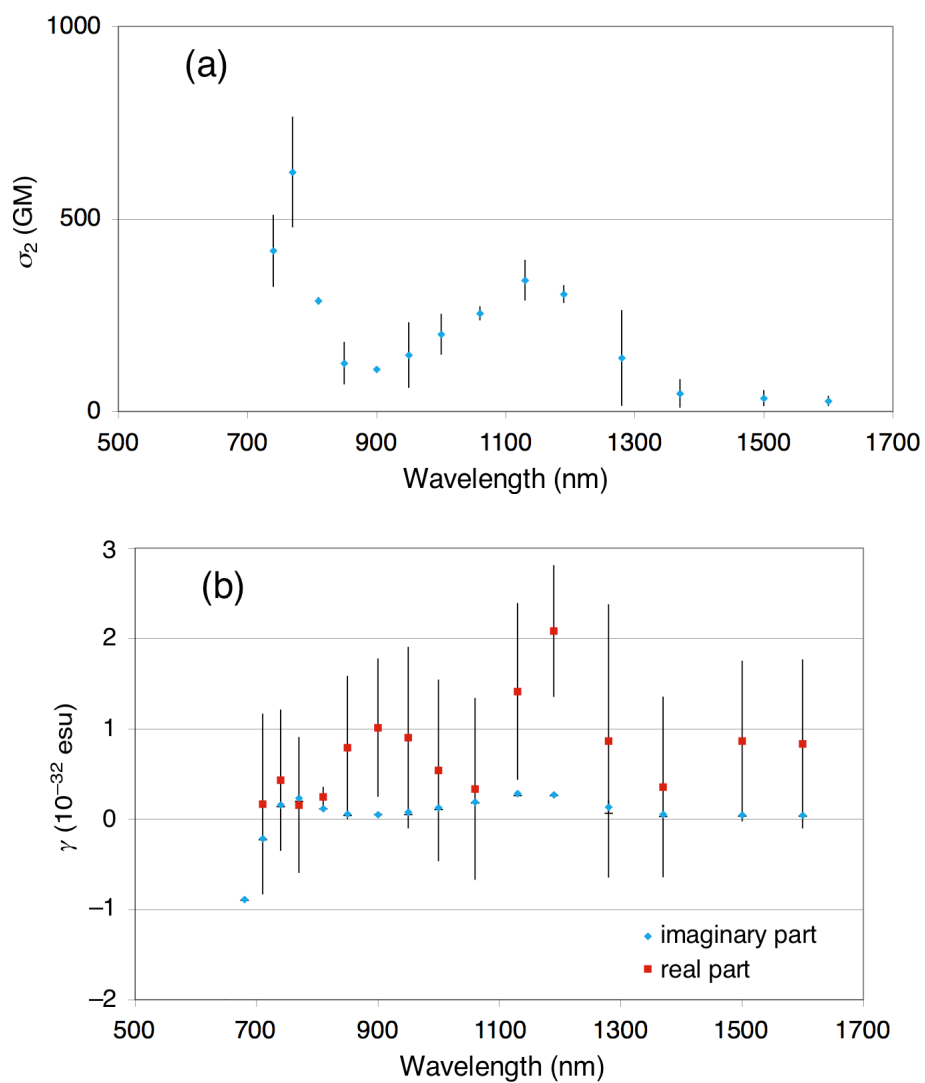

**Figure S8.** Dispersion of (a) the 2PA cross-section and (b) the complex cubic hyperpolarizability of salt **8**.



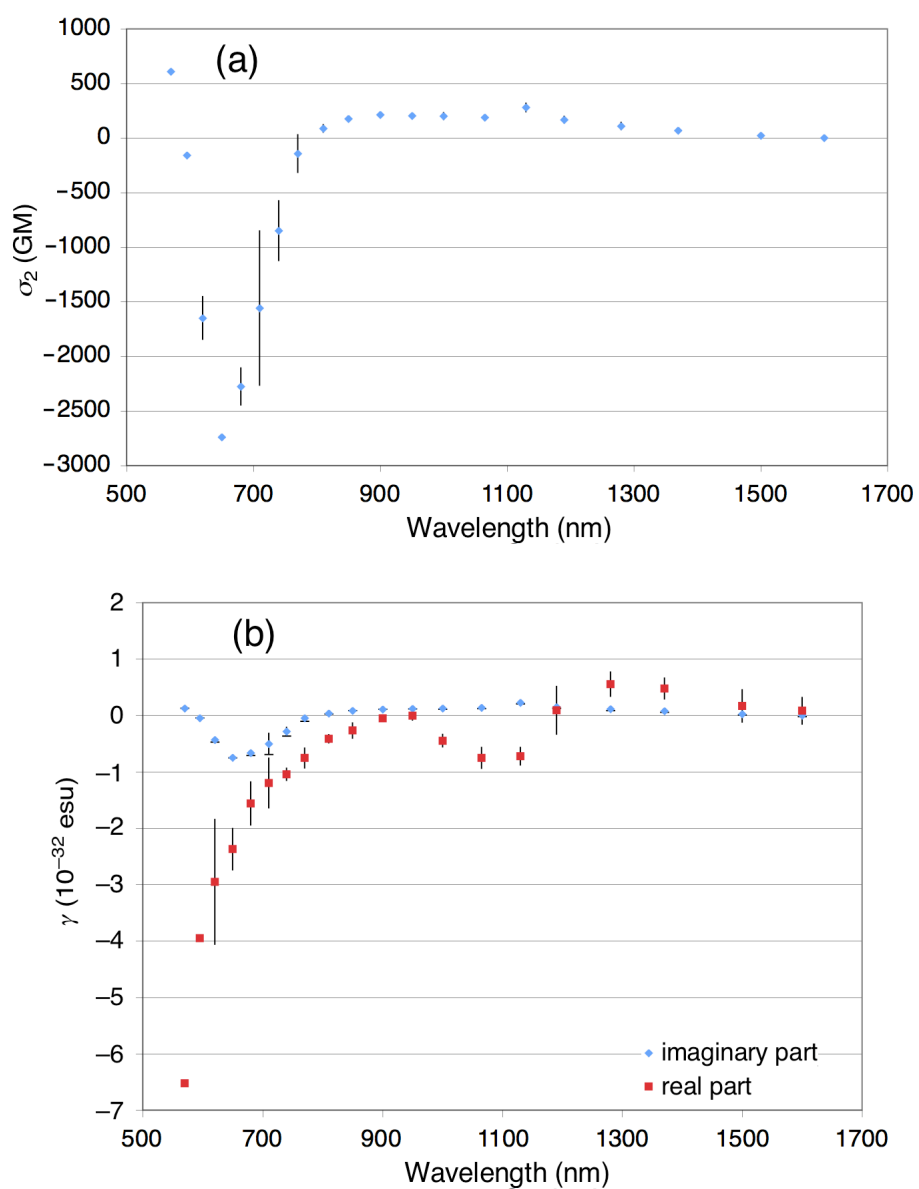

**Figure S9.** Dispersion of (a) the 2PA cross-section and (b) the complex cubic hyperpolarizability of salt **9**.

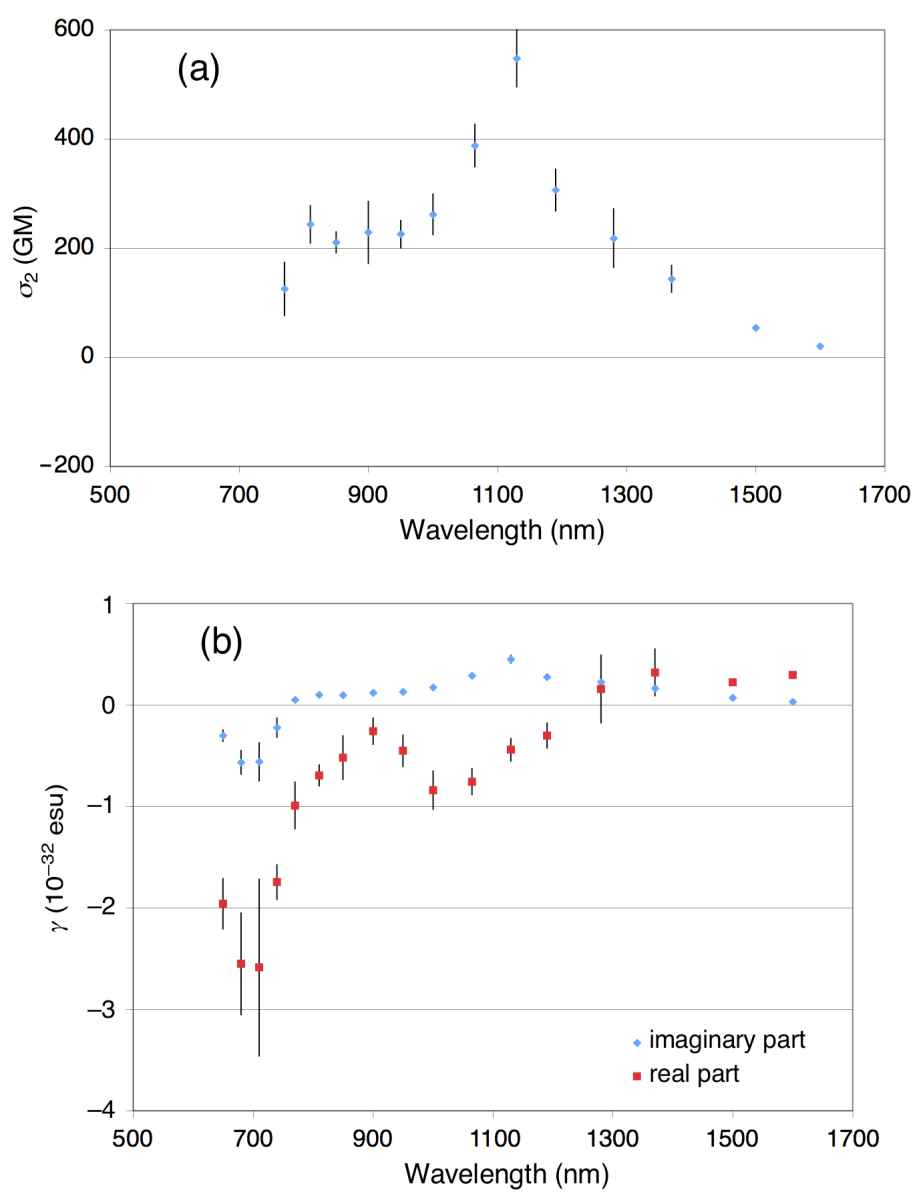

**Figure S10.** Dispersion of (a) the 2PA cross-section and (b) the complex cubic hyperpolarizability of salt 10.

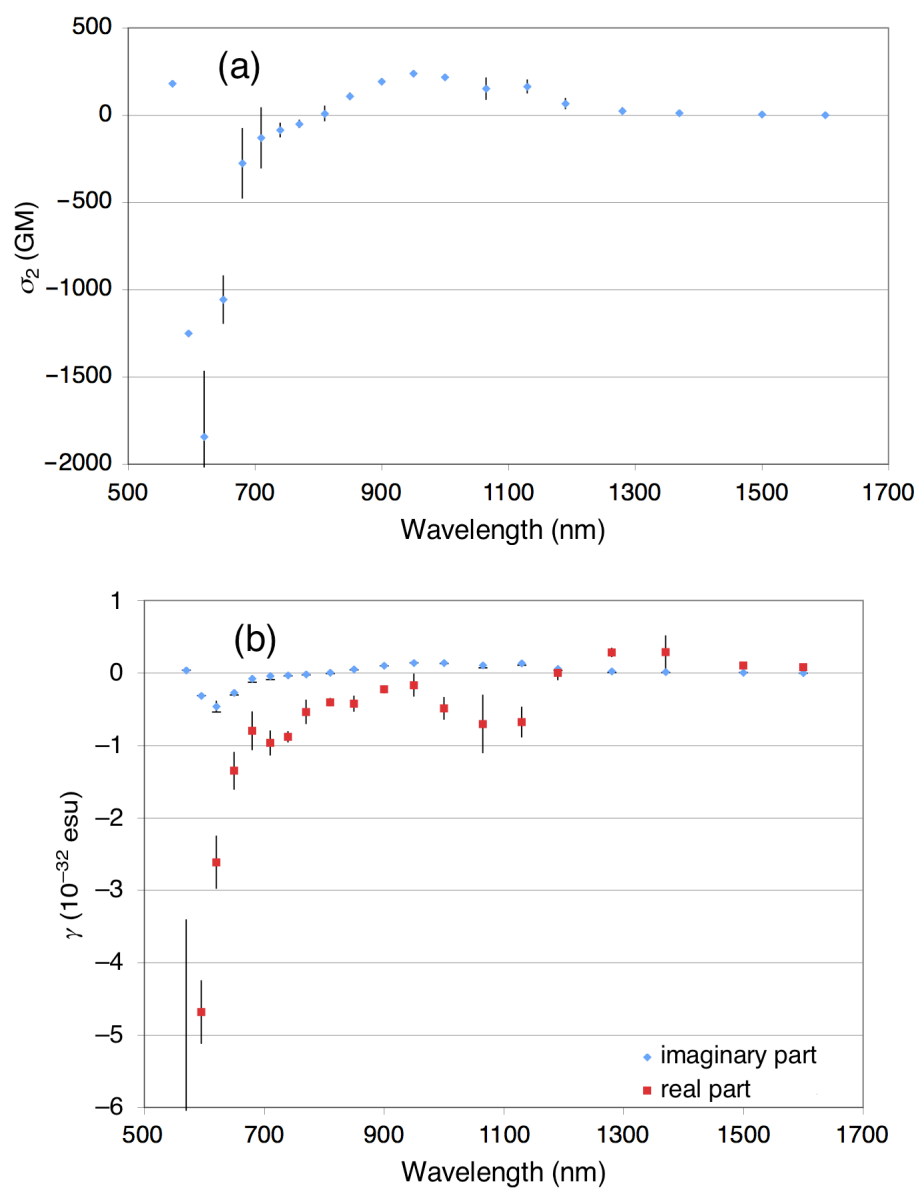

**Figure S11.** Dispersion of (a) the 2PA cross-section and (b) the complex cubic hyperpolarizability of salt **11**.

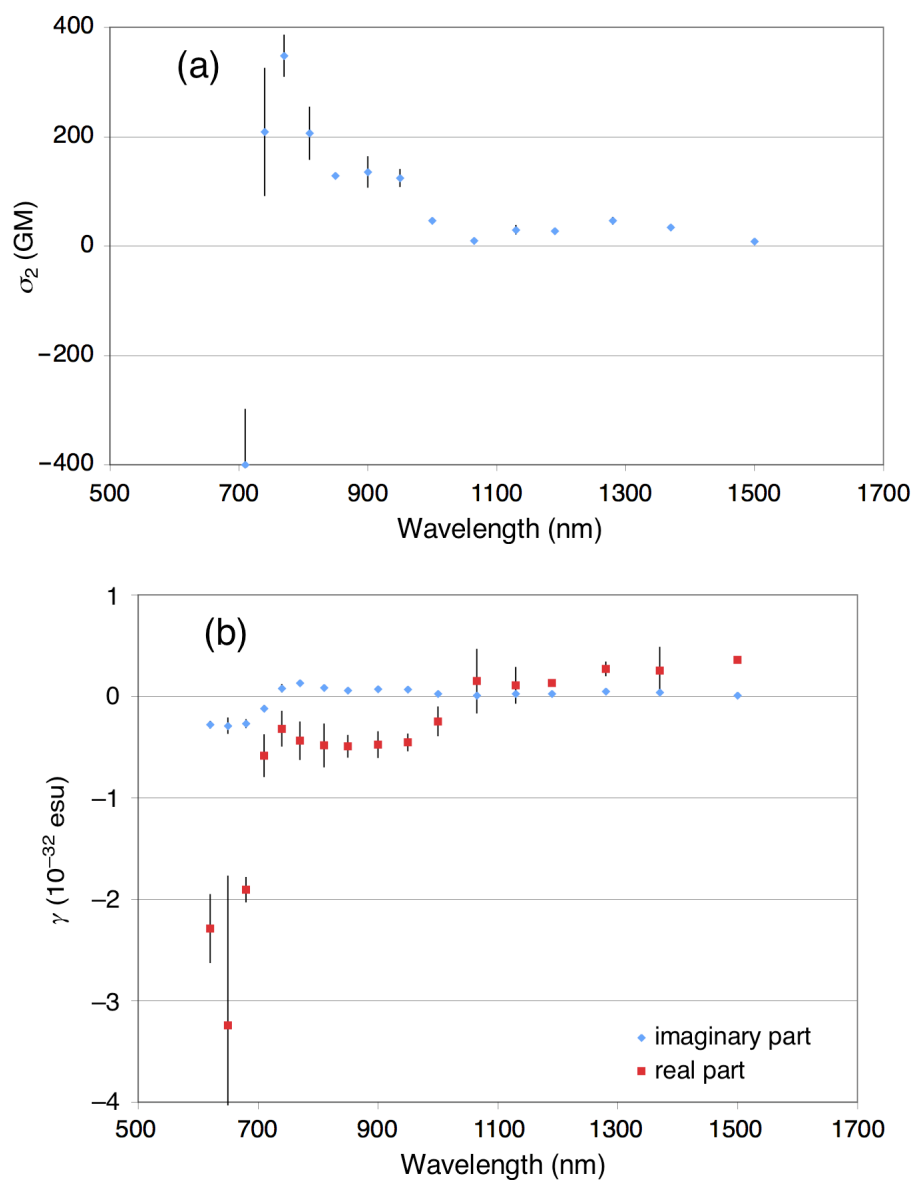

**Figure S12.** Dispersion of (a) the 2PA cross-section and (b) the complex cubic hyperpolarizability of salt 12.
